# Supplementary material
Source: bioRxiv or medRxiv preprint supplement (https://www.biorxiv.org/highwire/filestream/8229/field_highwire_adjunct_files/5/030619-6.pdf)

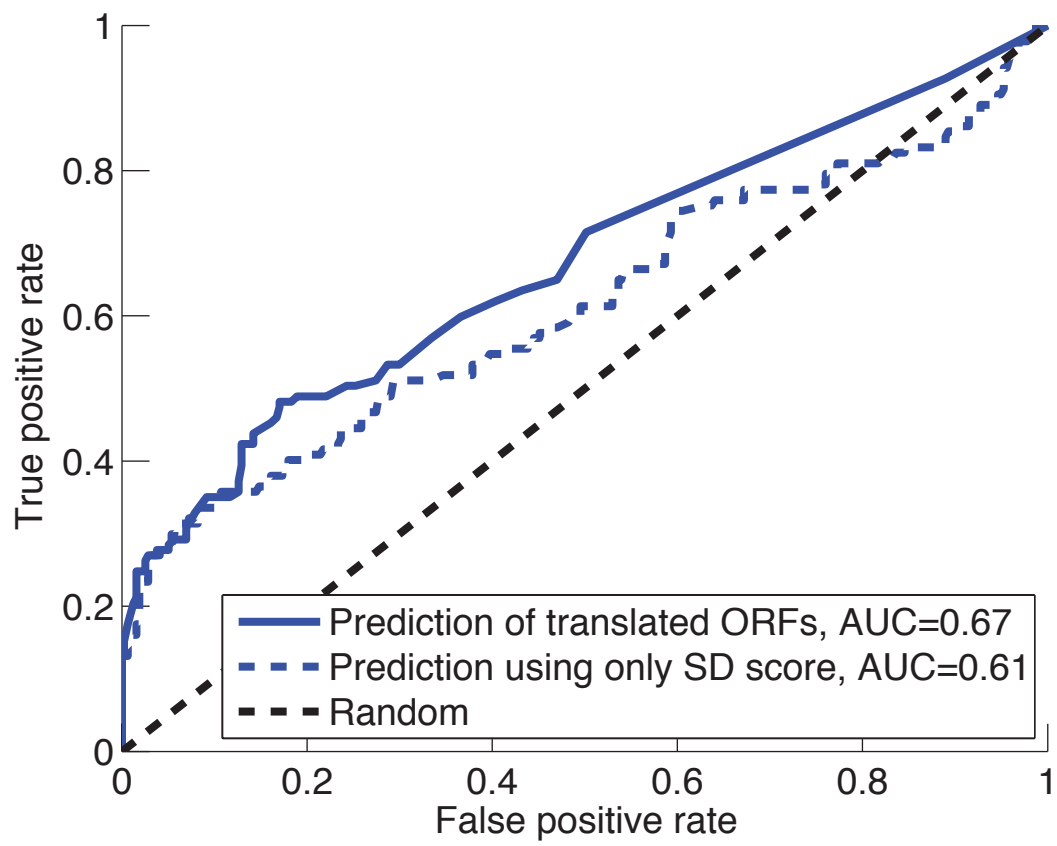

Supplement: Supplementary file [file 030619-6.pdf]
